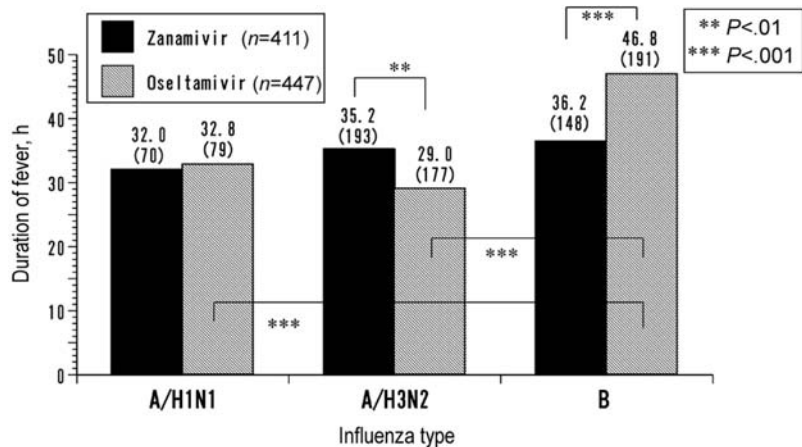

**Figure 1.** Duration of fever after the first dose of zanamivir or oseltamivir in patients with influenza A/H1N1, influenza A/H3N2, and influenza B virus infection. Numbers shown above the bars indicate percentage (number) of patients.

( $\pm$ SD) of fever was significantly ( $P < .01$ ) shorter in those who received oseltamivir therapy ( $29.0 \pm 24.8$  h) than it was in those who received zanamivir therapy ( $35.2 \pm 19.7$  h). For patients with influenza B, the mean duration ( $\pm$ SD) of fever was significantly ( $P < .001$ ) longer in those who received oseltamivir therapy ( $46.8 \pm 29.6$  h) than it was in those who received zanamivir therapy ( $36.2 \pm 19.7$  h). Among the patients who received oseltamivir therapy, the duration of fever was significantly longer in those with influenza B than it was in those with influenza A/H1N1 or A/H3N2 (figure 1). However, there were no statistically significant differences in the effectiveness of zanamivir therapy among patients with influenza A/H1N1, A/H3N2, or B (figure 1).

The respective reported mean values of inhibitory concentrations of 50% of zanamivir and oseltamivir were 1.14 and 0.90 nmol/L for influenza A/H1N1, 2.09 and 0.73 nmol/L for influenza A/H3N2, and 4.15 and 11.53 nmol/L for influenza B [8]. These findings may explain our results from a clinical context, because they reveal that oseltamivir is slightly more effective against influenza A/H3N2 and less effective against influenza B, compared with zanamivir therapy; this would indicate zanamivir for the treatment of influenza

B virus infection. Recently, the World Health Organization reported that 39% of influenza A/H1N1 virus isolates worldwide were resistant to oseltamivir [9]. Zanamivir is indicated for use against influenza A/H1N1 virus strains that are resistant to oseltamivir. In conclusion, compared with zanamivir, oseltamivir was shown to be less effective against influenza B but more effective against influenza A/H3N2.

### Acknowledgments

**Potential conflicts of interest.** All authors: no conflicts.

Naoki Kawai,<sup>1</sup> Hideyuki Ikematsu,<sup>1,2</sup>  
Norio Iwaki,<sup>1</sup> Tetsunari Maeda,<sup>1</sup>  
Takashi Kawashima,<sup>1</sup> Nobuo Hirotsu,<sup>1</sup> and  
Seizaburo Kashiwagi<sup>3</sup>

<sup>1</sup>Japan Physicians Association, Tokyo, and  
<sup>2</sup>Department of Clinical Research, Hara-doi Hospital,  
and <sup>3</sup>National Kyushu Medical Center,  
Fukuoka, Japan

### References

1. Kawai N, Ikematsu H, Iwaki N, et al. Factors influencing the effectiveness of oseltamivir and amantadine for the treatment of influenza: a multicenter study from Japan of the 2002–2003 influenza season. *Clin Infect Dis* 2005;40:1309–16.
2. Kawai N, Ikematsu H, Iwaki N, et al. A comparison of the effectiveness of oseltamivir for the treatment of influenza A and influenza B: a Japanese multicenter study of the 2003–2004

and 2004–2005 influenza seasons. *Clin Infect Dis* 2006;43:439–44.

3. Kawai N, Ikematsu H, Iwaki N, et al. Longer virus shedding in influenza B than in influenza A among outpatients treated with oseltamivir. *J Infect* 2007;55:267–72.
4. Kawai N, Ikematsu H, Iwaki N, et al. Zanamivir treatment is equally effective for both influenza A and influenza B. *Clin Infect Dis* 2007;44:1666.
5. Kawai N, Ikematsu H, Iwaki N, et al. A comparison of the effectiveness of zanamivir and oseltamivir for the treatment of influenza A and B. *J Infect* 2008;56:51–7.
6. Sugaya N, Mitamura K, Yamazaki M, et al. Lower clinical effectiveness of oseltamivir against influenza B contrasted with influenza A infection in children. *Clin Infect Dis* 2007;44:197–202.
7. Sugaya N, Tamura D, Yamazaki M, et al. Comparison of the clinical effectiveness of oseltamivir and zanamivir against influenza virus infection in children. *Clin Infect Dis* 2008;47:339–45.
8. Boivin G, Goyette N. Susceptibility of recent Canadian influenza A and B virus isolates to different neuraminidase inhibitors. *Antiviral Res* 2002;54:143–7.
9. World Health Organization. Influenza A(H1N1) resistance to oseltamivir—2008 influenza season, Southern Hemisphere. Available at: <http://www.who.int/csr/disease/influenza/H1N1200801013.pdf>. Accessed 11 February 2009.

Reprints or correspondence: Dr. Naoki Kawai, 4-9 Tomomachi, Gifu City, 500-8116, Japan (nkawai@city.gifu.med.or.jp).

*Clinical Infectious Diseases* 2009;48:996–7

© 2009 by the Infectious Diseases Society of America. All rights reserved. 1058-4838/2009/4807-0025\$15.00  
DOI: 10.1086/597360

### Paradoxical Relationship between the Clinical Outcome of *Staphylococcus aureus* Bacteremia and the Minimum Inhibitory Concentration of Vancomycin

TO THE EDITOR—We investigated the relationship between the MIC of vancomycin and clinical outcomes in patients with *Staphylococcus aureus* bacteremia who were treated with vancomycin. Overall, patients who were infected with strains for which the MIC of vancomycin was  $>1.5 \mu\text{g/mL}$  had a lower 3-month mortality rate than did patients who were infected with strains for which the MIC was  $<1 \mu\text{g/mL}$ . This is in contrast to findings from previously published work [1].

A prospective clinical study was undertaken from August 2006 through March 2007 of cases of *S. aureus* bacteremia at a teaching hospital on the south coast of England. Clinical data were collected by patient interview and case note review. Patients were observed for 3 months after their first positive blood culture result to determine clinical outcome and survival. The genetic lineage of *S. aureus* isolates was determined using a rapid restriction-modification test [2], and vancomycin MICs were determined by Etest (AB Biodisk).

One hundred cases of *S. aureus* bacteremia were studied. Forty-five patients (45%) were treated with vancomycin; 14 (31.1%) of 45 were infected with methicillin-susceptible *S. aureus*, and 31 (68.9%) were infected with methicillin-resistant *S. aureus*. The MICs of vancomycin for these 45 isolates had a range of 0.75–2.00 µg/mL. Sixteen (35.6%) of the 45 patients died ≤3 months after diagnosis. An MIC of vancomycin <1.5 µg/mL was associated with a significantly greater risk of death at 3 months (OR, 12; 95% CI, 1.73–83.2; *P* = .001), compared with an MIC of vancomycin ≥1.5 µg/mL, as illustrated in figure 1. Clonal complexes (CC22, CC30 equating to EMRSA-15, and EMRSA-16) accounted for most isolates for which the vancomycin MIC was low, but genotype was not significantly associated with clinical outcome.

Soriano et al. [1] reported that higher MICs of vancomycin were associated with poor outcome when vancomycin was used for treatment. In our hospital in the United Kingdom, where EMRSA-15 and -16 are the dominant clones, we have found the reverse. This suggests that there may be geographical variation in the usefulness of the vancomycin MIC as a predictor of outcome.

### Acknowledgments

We thank Dr. Jodi Lindsey for her advice on restriction modification assays.

**Financial support.** The Hospital Infection So-

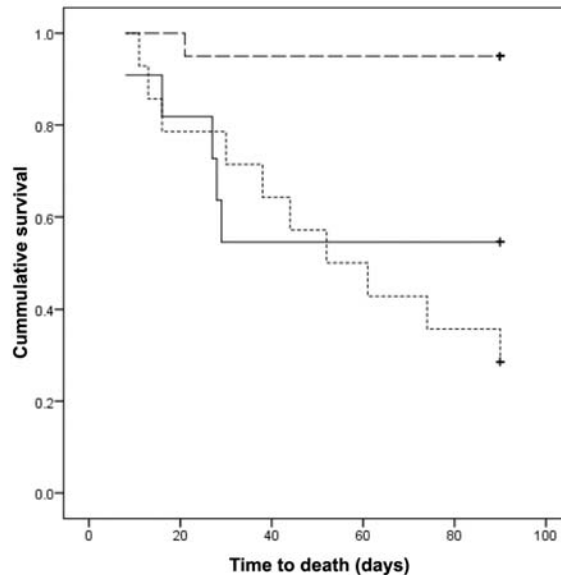

**Figure 1.** Kaplan-Meier survival curve for 45 patients with *Staphylococcus aureus* bacteremia who were treated with vancomycin and the different MIC ranges of vancomycin (MIC <1 µg/mL [continuous line], 11 patients; MIC of 1–1.49 µg/mL [dotted line], 14 patients; and MIC of 1.5–2 µg/mL [dashed line], 20 patients).

ciety and an unrestricted educational grant from Novartis.

**Potential conflicts of interest.** All authors: no conflicts.

**James Price,<sup>1</sup> Stephen Atkinson,<sup>2</sup> Martin Llewelyn,<sup>1</sup> and John Paul<sup>2</sup>**

<sup>1</sup>Brighton and Sussex Medical School, Medical Research Building, University of Sussex, and

<sup>2</sup>Brighton and Sussex University Hospital National Health Service Trust, Department of Microbiology, Royal Sussex County Hospital, Brighton, United Kingdom

### References

1. Soriano A, Marco F, Martinez JA, et al. Influence of vancomycin minimum inhibitory concentration on the treatment of methicillin-resistant *Staphylococcus aureus* bacteremia. *Clin Infect Dis* 2008;46:193–200.
2. Cockfield JD, Pathak S, Edgeworth JD, Lindsay JA. Rapid determination of hospital-acquired methicillin-resistant *Staphylococcus aureus* lineages. *J Med Microbiol* 2007;56:614–9.

Reprints or correspondence: Dr. John Paul, Brighton and Sussex University Hospital NHS Trust, Dept. of Microbiology, Royal Sussex County Hospital, Eastern Rd., Brighton, BN2 5BE, United Kingdom (John.Paul@bsuh.nhs.uk).

**Clinical Infectious Diseases** 2009;48:997–8

© 2009 by the Infectious Diseases Society of America. All rights reserved. 1058-4838/2009/4807-0026\$15.00  
DOI: 10.1086/597359
